# Supplementary material
Source: publisher figshare collection journal article supplement (https://rs.figshare.com/ndownloader/files/14331536)
Supplement: Supplementary file 1 [file 14331536]

**Electronic Supplementary material Table S1**

**J Zhang *et al*., Relevance of heterokaryosis for adaptation and azole-resistance development in *Aspergillus fumigatus. Proceedings B.* DOI: 10.1098/rspb.2018.2886**

Table S1. Five Patient characteristics including the underlying disease, the number of isolates collected and resistance switch during the treatment.

| **Patient number** | **Age / sex** | **Underlying disease** | ***Aspergillus* disease** | **# of *A. fumigatus* isolates** | **Characteristics** | **Reference** |
| --- | --- | --- | --- | --- | --- | --- |
| P1 | 1. 48 / M* | TNF receptor-associated periodic syndrome (TRAPS) | Aspergilloma | 4 | Phenotype switch from azole-susceptible to azole-resistant. | Camps 2012b |
| P2 | 2. 21 / M* | Chronic granulomatous disease | Relapse invasive aspergillosis | 4 | Phenotype switch from azole-susceptible to azole-resistant and fitness-cost. | Arendrup 2010, Camps 2012b |
| P3 | 3. 59 / F* | Kidney transplant | Invasive aspergillosis with abdominal abscess | 2 | Azole-resistant, different colony phenotypes. | Kuipers 2011 |
| P4 | 4. 62 / M | Liver cirrhosis | *Aspergillus* sinusitis | 2 | Azole-susceptible, different colony phenotypes | This study |
| P5 | 5. 28 / F | Cystic Fibrosis (CF) | Chronic colonization since 2004 | 2 | Azole-susceptible, cultured 27 months apart (2013 and 2015). | This study |

*patient died
